# Supplementary material for: Optofluidic laser array based on stable high-Q Fabry–Pérot microcavities
Source: Royal Society of Chemistry journal article supplement (doi:10.1039/c5lc00847f), 2015-01-01
Supplement: c5lc00847f1.pdf [file c5lc00847f1.pdf]

## **Supplementary information for**

# **Optofluidic laser array based on stable high-Q Fabry-Pérot microcavities**

Wenjie Wang,<sup>a\*</sup> Chunhua Zhou,<sup>a</sup> Tingting Zhang,<sup>a</sup> Jingdong Chen,<sup>a</sup>  
Shaoding Liu<sup>a</sup> and Xudong Fan<sup>ab\*</sup>

<sup>a</sup>Key Lab of Advanced Transducers and Intelligent Control System of Ministry of Education,  
Taiyuan University of Technology, 79 Yingze Street, Taiyuan 030024, P. R. China

<sup>b</sup>Department of Biomedical Engineering, University of Michigan,  
1101 Beal Avenue, Ann Arbor, Michigan 48109, United States

\*wangwenjie@tyut.edu.cn

\*xsfan@umich.edu

### I. Finesse measurement using the cavity scanning method

As an auxiliary method to characterize the p-c and p-p FP cavities in Type 1 and Type 2 chips, we measured the transmission spectrum at a fixed laser wavelength using the scanning cavity method.<sup>[1]</sup> Experimental setup is shown in Fig. S1. The wavelength of a single-mode cw laser was fixed at  $\lambda_0=561$  nm. Plano mirror M1 (without any concave structure) was mounted in a one dimensional translation stage (Stage 1) that could move along the z direction and was controlled by a piezo actuator. Mirror M2 with an array of concave microwells on the surface was mounted on a translation stage (Stage 2) that provided four axes of adjustments, including the x and y direction and the two angular orientations. The cavity was first aligned with Stage 2 and then the cavity length was scanned along the z direction by the piezo actuator for a few free-spectral-ranges (FSRs) with the initial cavity length at 50  $\mu\text{m}$ . The transmission spectrum was collected by a photo-detector that was connected to the oscilloscope. The finesse,  $F$ , can be obtained by  $F=\text{FSR}/\delta\nu$ , where  $\delta\nu$  is the FWHM (full-width at half-maximum) of the transmission peak using a Lorentzian fit. For a p-c FP cavity, the laser beam passed M1 and a concave microwell on M2. For the corresponding p-p FP cavity, the laser beam passed M1 and a place on M2 that did not have a microwell.

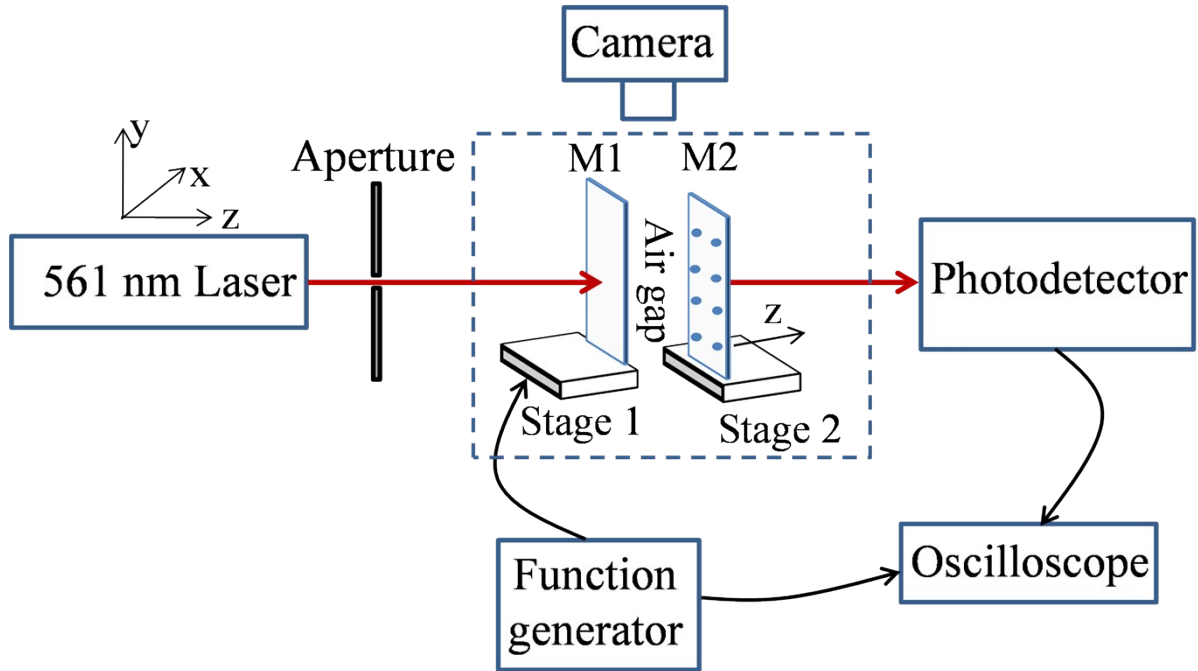

Figure S1 Experimental setup for finesse measurement using the scanning cavity method.

## II. Q-factor and finesse estimation using the laser threshold

The lasing behavior of the cavity system for a given dye concentration can be described with a parameter  $\gamma(\lambda)$ , the minimum fraction of the excited molecules,

$$\gamma(\lambda) = \frac{\sigma_a(\lambda_L)}{\sigma_a(\lambda_L) + \sigma_e(\lambda_L)} \left(1 + \frac{Q_{abs}}{Q_0}\right) \quad (1)$$

where  $\sigma_a$  and  $\sigma_e$  represent the absorption and emission cross section, respectively;  $\lambda_L$  is the emission wavelength;  $Q_0$  is the empty cavity Q-factor when the cavity is filled with solvent in the absence of dye;  $Q_{abs}$  is the Q-factor related to the dye absorption, i.e.

$$Q_{abs} = \frac{2\pi n}{\lambda_L n_T \sigma_a(\lambda_L)} \quad (2)$$

where  $n$  and  $n_T$  denotes the refractive index of the solvent and the total concentration of dye molecules, respectively. According to the three-level model at steady state,  $\gamma$  is directly related to the pump threshold  $P_{th}$ . After a straightforward derivation,  $P_{th}$  is obtained as

$$P_{th} = \frac{8\pi h c^2 n^2 \Delta t}{\lambda_L^4 \lambda_p E(\lambda_L)} \times \frac{A(1+C)}{1-BC} \quad (3)$$

where  $h$ ,  $c$ ,  $\Delta t$ ,  $\lambda_p$ , and  $E(\lambda_L)$  represent the plank constant, light velocity in vacuum, pulse width, pump wavelength, and fluorescence quantum distribution at emission wavelength, respectively;  $A = \sigma_a(\lambda_L)/\sigma_a(\lambda_p)$ ,  $B = \sigma_a(\lambda_L)/\sigma_e(\lambda_L)$ , and  $C = Q_{abs}/Q_0$ .

The parameters and the Q-factor/finesses for the cavities in Fig. 3 are tabulated in Table S2.

## III. Calculation of fluidic dome volume and cavity mode volume

1: Fluidic volume  $V_d = \pi a^2 t$ , where we use Gaussian fit  $f = t \times \exp\left(-\frac{x^2 + y^2}{a^2}\right)$  to approximate the surface profile of a concave microwell.

2: Optical cavity mode volume of TE<sub>00</sub> mode

The electric field distribution  $E(x, y, z)$  of standing waves in the resonator cavity is

$$E(x, y, z) \propto \exp\left(-\frac{x^2 + y^2}{w^2(z)}\right) \cos\left(\frac{2\pi}{\lambda} z\right) \quad (4)$$

where

$$w(z) = w_0 \times \left[1 + \left(\frac{\lambda z}{\pi w_0^2}\right)^2\right]^{1/2} \quad (5)$$

with  $w_0$  the minimum beam waist along z direction.

For the p-c FP microcavity, the radius of plano mirror is  $R_1 = \infty$ , and the radius of concave mirror is  $R_2$  (we take  $R_2$  as the minimum radius of surface curve of the concave microwell).

Then we get  $g_1 = 1 - t/R_1 = 1$ ,  $g_2 = 1 - t/R_2$  and the beam waist for the plano and concave mirror is

$$w_1 = \left(\frac{t\lambda}{\pi}\right)^{1/2} \left(\frac{g_2}{1-g_2}\right)^{1/4}, \quad w_2 = \left(\frac{t\lambda}{\pi}\right)^{1/2} \left(\frac{1}{g_2(1-g_2)}\right)^{1/4} \quad (6)$$

The cavity length  $t$  is very short; and the calculated  $w_1$  and  $w_2$  are nearly the same (as shown in Table S3), simply we can get the optical cavity mode volume  $V_c$  of the p-c microcavity as

$$V_c = \iiint |E(x,y,z)|^2 dx dy dz \approx \frac{1}{4}\pi w_1^2 t \approx \frac{1}{4}\pi w_2^2 t \quad (7)$$

The parameters, fluidic volume, and cavity mode volumes for the cavities in Fig. 5 are tabulated in Table S3.

Table S1: Summary of optofluidic lasers generated using different types of optical cavities

| Cavity type                                                                                                                                 | Pump conditions                         | Gain medium                                           | Lasing<br>(wavelength, threshold,<br>$Q_0$ value)                                                                                                                                                           | Citations |
|---------------------------------------------------------------------------------------------------------------------------------------------|-----------------------------------------|-------------------------------------------------------|-------------------------------------------------------------------------------------------------------------------------------------------------------------------------------------------------------------|-----------|
| FP cavity:<br>Cr/Au mirrors, reflectivity 83%<br>and 72%; optical cavity length<br>21.6 $\mu\text{m}$                                       | Nd: YAG laser:<br>532 nm, 5 ns, 10 Hz   | R6G, 0.01 M                                           | 570 nm, 30 mW/cm <sup>2</sup><br>(~30 $\mu\text{J}/\text{mm}^2$ )                                                                                                                                           | Ref. [2]  |
| Four-ring-cavity with total<br>internal reflection                                                                                          | Nd: YAG laser:<br>532 nm, 0.5 ns, 5 kHz | R6G, 0.01 M                                           | 569 nm, 15 $\mu\text{J}/\text{mm}^2$                                                                                                                                                                        | Ref. [3]  |
| FP cavity :<br>Au coating on plano fiber end;<br>cavity length 600 $\mu\text{m}$                                                            | Nd: YAG laser:<br>532 nm, 0.5 ns, 5 kHz | R6G, 0.01 M                                           | 25 $\mu\text{J}/\text{mm}^2$                                                                                                                                                                                | Ref. [4]  |
| FP cavity:<br>Au coating on plano fiber end,<br>reflectivity 80%; cavity length<br>140 $\mu\text{m}$                                        | Nd: YAG laser:<br>532 nm, 0.5 ns, 5 kHz | R6G, 1 mM                                             | 569 nm, 2 $\mu\text{J}/\text{mm}^2$                                                                                                                                                                         | Ref. [5]  |
| FP cavity:<br>Au coating on plano fiber end;<br>cavity length 550 $\mu\text{m}$                                                             | Nd: YAG laser:<br>532 nm, 5 ns          | R6G, 5 mM                                             | 569 nm                                                                                                                                                                                                      | Ref. [6]  |
| FP cavity:<br>Au coating on plano fiber end;<br>cavity length 18 $\mu\text{m}$                                                              | Nd: YAG laser:<br>532 nm, 0.5 ns        | R6G, 1 mM                                             | 565 nm, 10 $\mu\text{J}/\text{mm}^2$                                                                                                                                                                        | Ref. [7]  |
| FP cavity: two concave mirrors<br>(curvatures, 10 mm and 50 mm),<br>DBR coating,<br>reflectivity>99.5%; cavity length<br>20 $\mu\text{m}$ ; | OPO:<br>465 nm, 5 ns, 10 Hz             | eGFP, ~300 $\mu\text{M}$                              | 850±200 pJ<br>(focal lens 30 mm)                                                                                                                                                                            | Ref. [8]  |
| FP cavity:<br>plano mirrors, DBR coating,<br>reflectivity>99.5%;<br>cavity length 18 $\mu\text{m}$ ;                                        | OPO:<br>465 nm, 5 ns                    | GFP, 600±200 $\mu\text{M}$<br>(in one bacterial cell) | 160±10 nJ<br>(focal lens 35 mm)                                                                                                                                                                             | Ref. [9]  |
| FP cavity:<br>Plano mirrors, Ag coating,<br>reflectivities >95% and > 80 %<br>( $\lambda$ >600 nm); cavity length ~125<br>$\mu\text{m}$     | Nd:YAG laser:<br>355 nm, 5 ns, 10 Hz    | DCM,<br>2 g/L in DMSO                                 | ~646 nm, ~110 nJ<br>(4× microscope objective<br>focal lens)                                                                                                                                                 | Ref. [10] |
| High-order (130 <sup>th</sup> ) Bragg grating                                                                                               | Nd: YAG laser:<br>532 nm, 0.5 ns, 5 kHz | R6G, 20 mM                                            | 582.7 nm, 20 $\mu\text{J}/\text{mm}^2$                                                                                                                                                                      | Ref. [11] |
| Phase shifted 15 <sup>th</sup> order<br>distributed feedback structure                                                                      | Nd: YAG laser:<br>532 nm, 6 ns          | R6G, 1 mM                                             | 567.3 nm, ~0.8 mJ/cm <sup>2</sup>                                                                                                                                                                           | Ref. [12] |
| 15 <sup>th</sup> -order Bragg grating                                                                                                       | Nd: YAG laser:<br>532 nm, 6 ns          | R6G, 2 mM                                             | 570 nm, 1 $\mu\text{J}$                                                                                                                                                                                     | Ref. [13] |
| Third-order distributed Bragg<br>grating                                                                                                    | Nd:YAG laser:<br>532 nm, 5 ns, 10 Hz    | R6G, 0.02M                                            | 581.41 nm, 65 $\mu\text{J}/\text{mm}^2$ (in<br>ethanol);<br>582.72 nm, 40 $\mu\text{J}/\text{mm}^2$<br>(in glycol);<br>587.86 nm, 10 $\mu\text{J}/\text{mm}^2$<br>(in the mixture of ethanol<br>and glycol) | Ref. [14] |
| Low-order (first, second, and<br>third) distributed feedback<br>resonators                                                                  | Nd:YAG laser:<br>532 nm, 4.5 ns         | R6G, 1 mg/mL<br>(~2 mM)                               | 569.1 nm, 78 nJ/pulse<br>(~62 $\mu\text{J}/\text{cm}^2$ , 20 $\mu\text{m}$ beam<br>radius waist, 5× objective<br>focal lens, second order<br>grating)                                                       | Ref. [15] |
| Second order circular distributed<br>feedback grating                                                                                       | Nd:YAG laser:<br>532 nm, 4.5 ns, 100 Hz | R6G, 1 mg/mL<br>(~2 mM)                               | 571.09 nm, 9.5 $\mu\text{J}/\text{pulse}$<br>(10× objective focal lens)                                                                                                                                     | Ref. [16] |
| Droplet (levitated in air),<br>diameter ~1mm                                                                                                | Nd:YAG laser:<br>532 nm, 5 ns, 10 Hz    | R6G, 20 mM                                            | ~630 nm, ~500 mW                                                                                                                                                                                            | Ref. [17] |
| Ring resonator (out-diameter:<br>ten to few hundreds of $\mu\text{m}$ , wall<br>thickness: a few $\mu\text{m}$ )                            | OPO:<br>532 nm, 10 ns, 20 Hz            | R6G, 2 mM                                             | 600 nm, 25 nJ/mm <sup>2</sup><br>(estimated $\eta Q_0 \approx 4 \times 10^6$ )                                                                                                                              | Ref. [18] |
| Droplets (diameters from 20 to<br>100 $\mu\text{m}$ )                                                                                       | Nd:YAG laser:<br>532 nm, 5 ns, 10 Hz    | R6G and R640                                          | ~590 and 675 nm,                                                                                                                                                                                            |           |

|                                                                                                    |                                         |                                                       |                                                                                                                     |              |
|----------------------------------------------------------------------------------------------------|-----------------------------------------|-------------------------------------------------------|---------------------------------------------------------------------------------------------------------------------|--------------|
| 40 $\mu\text{m}$ )                                                                                 | 532 nm                                  | 5 mM                                                  | 1 $\mu\text{J/pulse}$ (beam diameter 30 $\mu\text{m}$ )                                                             |              |
| Coupled optofluidic ring resonators                                                                | OPO:<br>532 nm, 5 ns                    | R6G, 2 mM                                             | 570 nm, 6 $\mu\text{J/mm}^2$                                                                                        | Ref. [20]    |
| A ring shaped channel, inner, outer radius and depth 150, 170, and 40 $\mu\text{m}$                | OPO:<br>532 nm, 5 ns, 20 Hz             | R6G, 1 mM                                             | 575 nm, $\sim 15 \mu\text{J/mm}^2$ (estimated $Q_0 \approx 3.3 \times 10^4$ )                                       | Ref. [21]    |
| Optofluidic ring resonators, inner diameter 70-90 $\mu\text{m}$ , wall thickness 1-2 $\mu\text{m}$ | OPO:<br>433 nm, 5 ns, 20 Hz             | Quantum dots(QDs), 2 $\mu\text{M}$ (in bulk solution) | 660-665 nm, 0.1 $\mu\text{J/mm}^2$ (estimated $\eta Q_0 \approx 1 \times 10^7$ )                                    | Ref. [22]    |
| Photonic crystal slab, a square lattice of air cylindrical holes                                   | Nd:YAG laser:<br>532 nm, 5 ns, 10 Hz    | R6G, 1 mM                                             | 580 nm, 90 nJ/mm <sup>2</sup> (pump laser resonantly enhanced by a factor of 80) (derived $Q_0 = 8.3 \times 10^3$ ) | Ref. [23]    |
| Biological tissues with scatters as the random resonator infiltrated with laser dye solution       | Nd:YAG laser:<br>532 nm, 100 ps, 100 Hz | R6G                                                   | $\leq 2 \mu\text{J/mm}^2$                                                                                           | Ref.[24]     |
| Cortical bone from bovine femurs immersed in laser dye solution                                    | OPO:<br>690 nm, 100 fs, 1 kHz           | R800 in ethanol or (DMSO), weight ratio: 0.3%         | 15 mW, size of pump beam: 100 $\mu\text{m} \times 3 \text{ mm}$ (estimated pump density: 50 $\mu\text{J/mm}^2$ )    | Ref. [25]    |
| Disordered optofluidic channel with structural disorder as the resonator                           | Nd:YAG laser:<br>532 nm, 6 ns, 20 Hz    | R6G, 2.5 mM                                           | 80 $\mu\text{J/mm}^2$                                                                                               | Ref. [26]    |
| Disordered optofluidic channel with structural disorder as the resonator                           | Nd:YAG laser:<br>532 nm, 7 ns, 10 Hz    | R6G, 2.5 mM                                           | 561.77 nm, 21 $\mu\text{J/mm}^2$ (spectrum and intensity of laser can be selected by the pump profile)              | Ref. [27]    |
| Plano-concave FP cavity with DBR coating, cavity length = 31 $\mu\text{m}$                         | OPO:<br>532 nm, 5 ns, 20 Hz             | R6G, 1 mM                                             | 599 nm, 90 nJ/mm <sup>2</sup> (derived $Q_0 = 5.6 \times 10^5$ , F=4000)                                            | Current work |

Table S2: Parameters used for the calculation of  $Q_0$ -factor/Finesse in Section II

|                                                                                                 |                       |                       |                      |                       |
|-------------------------------------------------------------------------------------------------|-----------------------|-----------------------|----------------------|-----------------------|
| Dye concentration                                                                               | 1 mM                  |                       |                      |                       |
| Pump wavelength $\lambda_p$ (nm)                                                                | 532                   |                       |                      |                       |
| Absorption cross section at $\lambda_p$ (cm <sup>2</sup> )                                      | $1.9 \times 10^{-16}$ |                       |                      |                       |
| Refractive index of the solvent n                                                               | 1.366                 |                       |                      |                       |
| Quantum yield q                                                                                 | 0.9                   |                       |                      |                       |
| Pulse width $\Delta t$ (ns)                                                                     | 5                     |                       |                      |                       |
| Chips                                                                                           | <b>Type 1</b>         |                       | <b>Type 2</b>        |                       |
| Microcavity                                                                                     | p-c cavity            | p-p cavity            | p-c cavity           | p-p cavity            |
| Lasing wavelength $\lambda_L$ (nm)                                                              | 592                   | 563                   | 599                  | 570                   |
| Absorption cross section at $\lambda_L$ (cm <sup>2</sup> )                                      | $1.4 \times 10^{-19}$ | $5.6 \times 10^{-18}$ | $5 \times 10^{-20}$  | $1.5 \times 10^{-18}$ |
| Emission cross section at $\lambda_L$ (cm <sup>2</sup> )                                        | $1.1 \times 10^{-16}$ | $1.7 \times 10^{-16}$ | $1 \times 10^{-16}$  | $1.6 \times 10^{-16}$ |
| Fluorescence distribution $E(\lambda_L)$ (1/nm)                                                 | $6.4 \times 10^{-3}$  | $1.2 \times 10^{-2}$  | $5.6 \times 10^{-3}$ | $1 \times 10^{-2}$    |
| $Q_{\text{abs}}$ at $\lambda_L$                                                                 | $1.7 \times 10^6$     | $4.5 \times 10^4$     | $4.8 \times 10^6$    | $1.6 \times 10^5$     |
| A                                                                                               | $7.5 \times 10^{-4}$  | $3.0 \times 10^{-2}$  | $2.6 \times 10^{-4}$ | $8.1 \times 10^{-3}$  |
| B                                                                                               | $1.3 \times 10^{-3}$  | $3.3 \times 10^{-2}$  | $4.8 \times 10^{-4}$ | $1 \times 10^{-2}$    |
| $8\pi\hbar c^2 n^2 \Delta t / \lambda_L^4 \lambda_p E(\lambda_L)$ ( $\mu\text{J}/\text{mm}^2$ ) | 33                    | 22                    | 36                   | 24                    |
| $P_{\text{th}}$ ( $\mu\text{J}/\text{mm}^2$ )                                                   | 0.33                  | 8.55                  | 0.09                 | 1.1                   |
| $Q_0$                                                                                           | $1.3 \times 10^5$     | $3.6 \times 10^3$     | $5.6 \times 10^5$    | $3.5 \times 10^4$     |
| Cavity length L ( $\mu\text{m}$ )                                                               | 49                    | 46                    | 31                   | 22                    |
| Finesse ( $= \lambda Q_0 / 2nL$ )                                                               | 575                   | 16                    | 4000                 | 332                   |

Table S3: Parameters used for the calculation of fluidic volume and cavity mode volume for Type 1 and Type 2 p-c cavities in Fig. 5.

| p-c FP microcavity                                         | Type 1 | Type 2 |
|------------------------------------------------------------|--------|--------|
| Laser wavelength (nm)                                      | 590.6  | 600    |
| Depth $t$ ( <i>i.e.</i> , cavity length) ( $\mu\text{m}$ ) | 4      | 8      |
| $a$ ( $\mu\text{m}$ )                                      | 24     | 70     |
| Effective diameter $d$ ( $\mu\text{m}$ )                   | 34     | 100    |
| Fluidic mode $V_d(\text{pL})$                              | 7      | 123    |
| $g_1$                                                      | 1      | 1      |
| Radius $R_2(\mu\text{m})$                                  | 78     | 306    |
| $g_2$                                                      | 0.9487 | 0.9739 |
| Beam waist $w_1(\mu\text{m})$                              | 1.7983 | 3.0550 |
| Beam waist $w_2(\mu\text{m})$                              | 1.8462 | 3.0957 |
| Optical cavity mode $V_c(\text{fL})$                       | 11     | 60     |



## References:

1. D. Hunger, T. Steinmetz, Y. Colombe, C. Deutsch, T. W. Hänsch, and J. Reichel, "A fiber Fabry–Perot cavity with high finesse," *New J. Phys.* **12**, 065038 (2010).
2. B. Helbo, A. Kristensen, and A. Menon, "A micro-cavity fluidic dye laser," *J. Micromech. Microeng.* **13**, 307–311 (2003).
3. J. C. Galas, J. Torres, M. Belotti, Q. Kou, and Y. Chen, "Microfluidic tunable dye laser with integrated mixer and ring resonator," *Appl. Phys. Lett.* **86**, 264101 (2005).
4. J. C. Galas, C. Peroz, Q. Kou, and Y. Chen, "Microfluidic dye laser intracavity absorption," *Appl. Phys. Lett.* **89**, 224101 (2006).
5. Q. Kou, I. Yesilyurt, and Y. Chen, "Collinear dual-color laser emission from a microfluidic dye laser," *Appl. Phys. Lett.* **88**, 091101 (2006).
6. G. Aubry, S. Méance, A.-M. Haghiri-Gosnet, and Q. Kou, "Flow rate based control of wavelength emission in a multicolor microfluidic dye laser," *Microelectron. Eng.* **87**, 765-768 (2010).
7. G. Aubry, Q. Kou, J. Soto-Velasco, C. Wang, S. Meance, J. J. He, and A. M. Haghiri-Gosnet, "A multicolor microfluidic droplet dye laser with single mode emission," *Appl. Phys. Lett.* **98**, 111111 (2011).
8. M. C. Gather, and S. H. Yun, "Single-cell biological lasers," *Nature Photon.* **5**, 406-410 (2011).
9. M. C. Gather, and S. H. Yun, "Lasing from Escherichia coli bacteria genetically programmed to express green fluorescent protein," *Opt. Lett.* **36**, 3299-3301 (2011).
10. A. J. C. Kuehne, M. C. Gather, I. A. Eydelnant, S.-H. Yun, D. A. Weitzad, and A. R. Wheeler, "A switchable digital microfluidic droplet dye-laser," *Lab Chip* **11**, 3716-3719 (2011).
11. S. Balslev, and A. Kristensen, "Microfluidic single-mode laser using high-order bragg grating and antiguiding segments," *Opt. Express* (2005).
12. Z. Li, Z. Zhang, T. Emery, A. Scherer, and D. Psaltis, "Single mode optofluidic distributed feedback dye laser," *Opt. Express* **14**, 696-701 (2006).
13. Z. Li, Z. Zhang, A. Scherer, and D. Psaltis, "Mechanically tunable optofluidic distributed feedback dye laser," *Opt. Express* **14**, 10494-10499 (2006).
14. M. Gersborg-Hansen, and A. Kristensen, "Optofluidic third order distributed feedback dye laser," *Appl. Phys. Lett.* **89**, 103518 (2006).
15. W. Song, A. E. Vasdekis, Z. Li, and D. Psaltis, "Low-order distributed feedback optofluidic dye laser with reduced threshold," *Appl. Phys. Lett.* **94**, 051117 (2009).
16. W. Song, A. E. Vasdekis, Z. Li, and D. Psaltis, "Optofluidic evanescent dye laser based on a distributed feedback circular grating," *Appl. Phys. Lett.* **94**, 161110 (2009).
17. H. Azzouz, L. Alkhafadiji, S. Balslev, J. Johansson, N. A. Mortensen, S. Nilsson, and A. Kristensen, "Levitated droplet dye laser," *Opt. Express* **14**, 4374-4379 (2006).
18. S. Lacey, I. M. White, Y. Sun, S. I. Shopova, J. M. Cupps, P. Zhang, and X. Fan, "Versatile opto-fluidic ring resonator lasers with ultra-low threshold," *Opt. Express* **15**, 15523-15530 (2007).
19. S. K. Tang, Z. Li, A. R. Abate, J. J. Agresti, D. A. Weitz, D. Psaltis, and G. M. Whitesides, "A multi-color fast-switching microfluidic droplet dye laser," *Lab Chip* **9**, 2767-2771 (2009).

20. W. Lee, H. Li, J. D. Suter, K. Reddy, Y. Sun, and X. Fan, "Tunable single mode lasing from an on-chip optofluidic ring resonator laser," *Appl. Phys. Lett.* **98**, 061103 (2011).
21. H. Chandralalim, Q. Chen, A. A. Said, M. Dugan, and X. Fan, "Monolithic optofluidic ring resonator lasers created by femtosecond laser nanofabrication," *Lab Chip* **15**, 2335-2340 (2015).
22. A. Kiraz, Q. Chen, and X. Fan, "Optofluidic Lasers with Aqueous Quantum Dots," *ACS Photonics* **2**, 707-713 (2015).
23. B. Zhen, S.-L. Chua, J. Lee, A. W. Rodriguez, X. Liang, S. G. Johnson, J. D. Joannopoulos, M. Soljačić, and O. Shapira, "Enabling enhanced emission and low-threshold lasing of organic molecules using special Fano resonances of macroscopic photonic crystals," *Proc. Natl. Acad. Sci. USA* **110**, 13711-13716 (2013).
24. R. C. Polson, and Z. V. Vardeny, "Random lasing in human tissues," *Appl. Phys. Lett.* **85**, 1289-1291 (2004).
25. Q. Song, S. Xiao, Z. Xu, J. Liu, X. Sun, V. Drachev, V. M. Shalaev, O. Akkus, and Y. L. Kim, "Random lasing in bone tissue," *Opt. Lett.* **35**, 1425-1227 (2010).
26. B. N. Shivakiran Bhaktha, N. Bachelard, X. Noblin, and P. Sebbah, "Optofluidic random laser," *Appl. Phys. Lett.* **101**, 151101 (2012).
27. N. Bachelard, S. Gigan, X. Noblin, and P. Sebbah, "Adaptive pumping for spectral control of random lasers," *Nature Phys.* **10**, 426-431 (2014).
